# Supplementary material for: Modelling local bending stiffness based on fibre orientation in sawn timber
Source: Springer Nature journal article supplement (doi:10.1007/s00107-018-1348-2), 2018-09-07
Supplement: MOESM1 [file 16107538]

Journal Name:

**European Journal of Wood and Wood Products**

Article name:

**Modelling local bending stiffness based on fibre orientation in sawn timber**

Author names:

Min Hu

Corresponding author,

Telephone: +46 (0)470 70 81 67

Fax: +46 (0)470 76 85 40

Email: min.hu@lnu.se

Department of Building Technology, Linnaeus University, Sweden

Anders Olsson

Department of Building Technology, Linnaeus University, Sweden

Marie Johansson

Department of Building Technology, Linnaeus University, Sweden

Jan Oscarsson

Department of Building Technology, Linnaeus University, Sweden

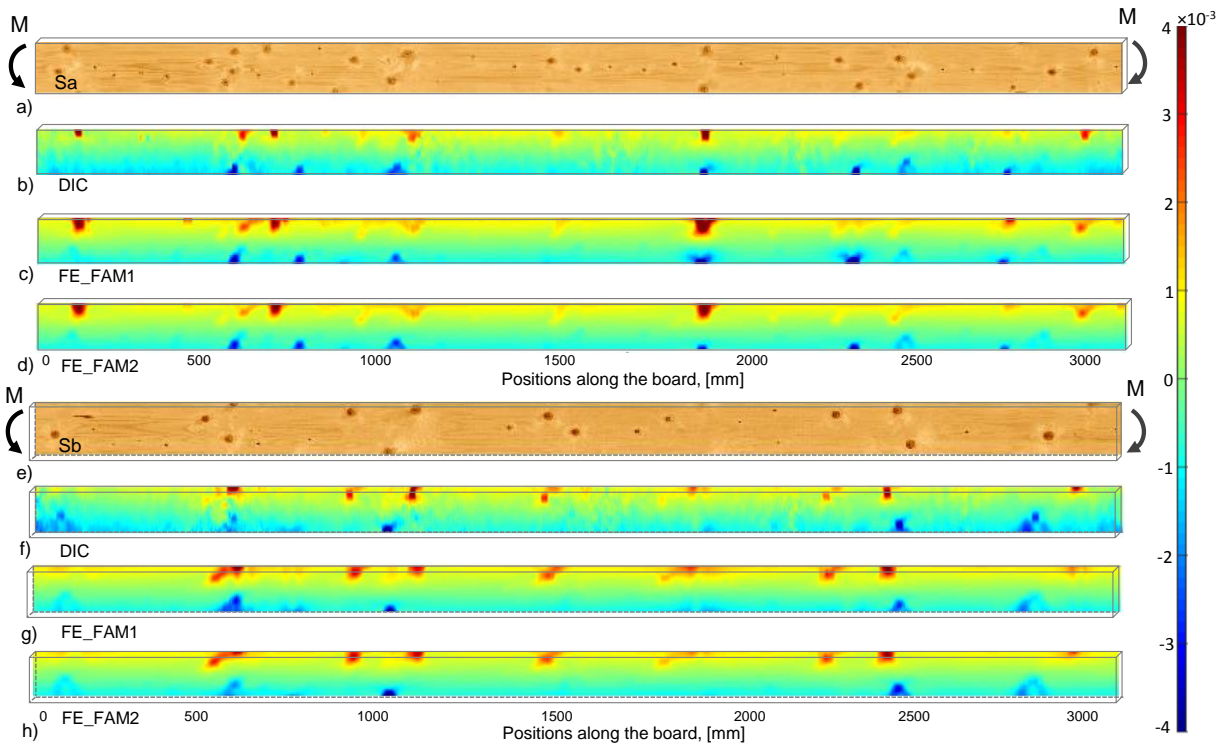

Sup\_Fig1. Longitudinal strain  $\epsilon_x$  distribution obtained at load stage 4 for specimen B1. a) Board surface image of Sa valid for the part which was exposed to the constant bending moment. b) The strain field valid for the part of the specimen in a) and calculated using the DIC data. c)–d): The strain field valid for the part of the specimen in a) and calculated using the data of FE\_FAM1 and FE\_FAM2, respectively. e)–h) The corresponding surface image and strain field results valid for surface Sb.

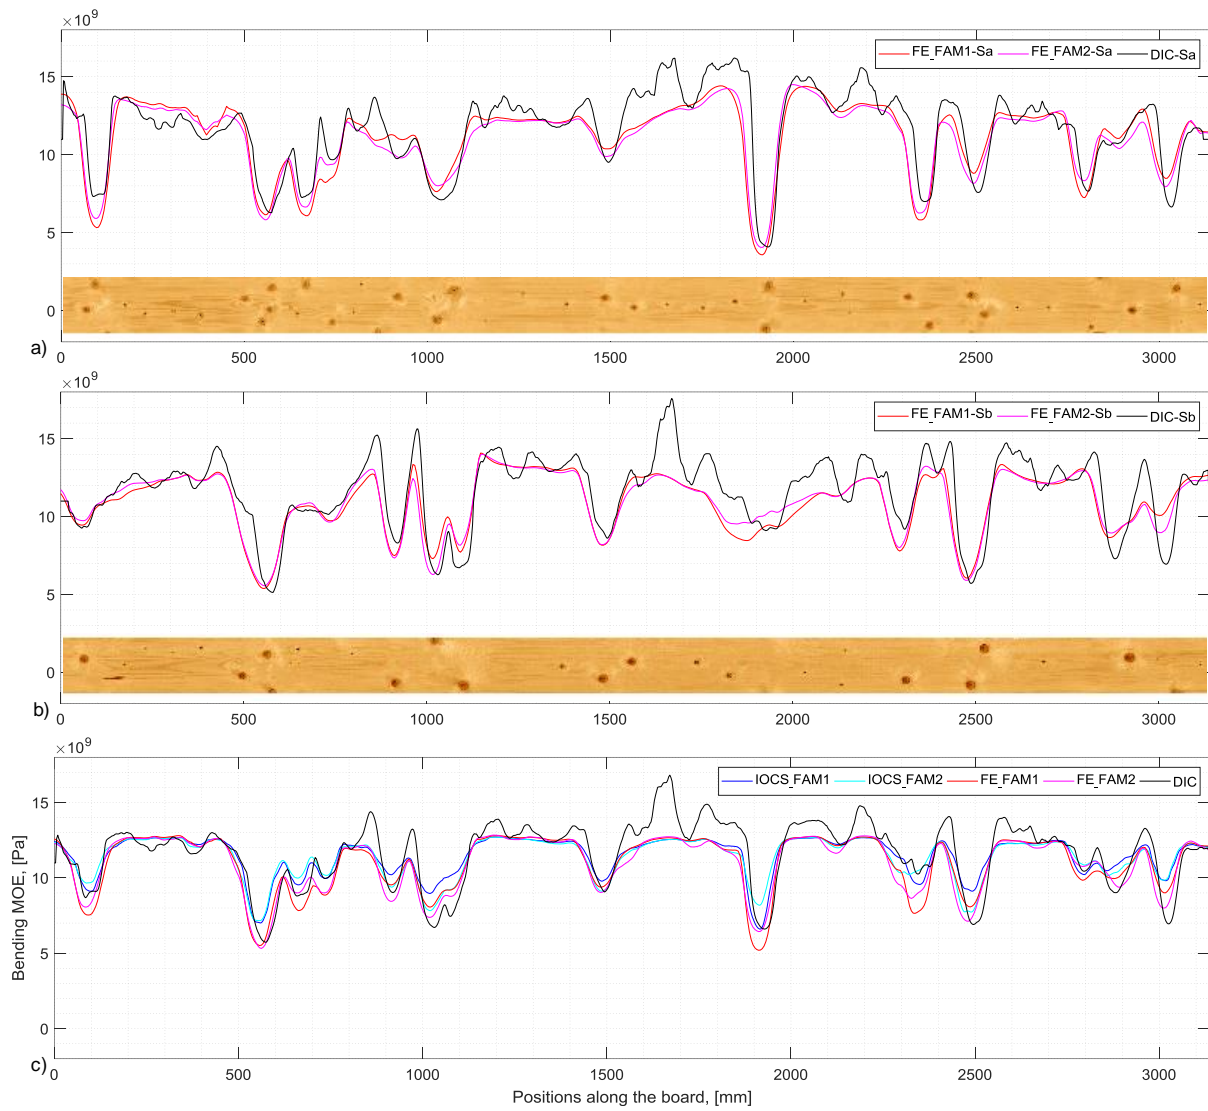

Sup\_Fig2. Bending MOE profiles for specimen B1, each value of the profiles representing the average bending MOE over a surrounding distance of 50 mm. a) Bending MOE profiles calculated based on strains, of stress level corresponding to load stage 4 in Table 3, of surface Sa that originate from DIC, FE\_FAM1 and FE\_FAM2, respectively; b) the corresponding bending MOE profiles based on strains of surface Sb; c) bending MOE profiles representing an average stiffness over the width of the board.
